# Supplementary material for: Interface engineering of microelectrodes toward ultrasensitive monitoring of β-amyloid peptides in cerebrospinal fluid in Alzheimer's disease
Source: Royal Society of Chemistry journal article supplement (doi:10.1039/c9an02285f), 2020-01-01
Supplement: c9an02285f1.pdf [file c9an02285f1.pdf]

## Electronic supplementary information

### Interface engineering of microelectrodes toward ultrasensitive monitoring of $\beta$ -amyloid peptides in cerebrospinal fluid in Alzheimer's disease

*Shushu Ding,<sup>†a</sup> Yunxia Xu,<sup>†a</sup> Qi Liu,<sup>a</sup> Hui Gu,<sup>b</sup> Anwei Zhu<sup>\*a</sup> and Guoyue Shi<sup>\*a</sup>*

<sup>a</sup> School of Chemistry and Molecular Engineering, Shanghai Key Laboratory for Urban Ecological Processes and Eco-Restoration, East China Normal University, 500 Dongchuan Road, Shanghai 200241, P.R. China

<sup>b</sup> School of Chemistry and Chemical Engineering, Key Laboratory of Theoretical Organic Chemistry and Functional Molecule of Ministry of Education, Hunan University of Science and Technology, Xiangtan, Hunan, 411201, P.R. China

<sup>†</sup> These authors contributed equally to this work.

## Abstract

This supporting information includes Zeta-potentials of gold nanoparticles, UV-vis absorption spectra and DLS analysis of  $\text{Cu}^{2+}$ -PEI/AuNPs-hemin nanoprobe, EDX spectra and XPS spectra to characterize the molecular assembly on electrode surface, optimization of electrochemical detection conditions, reproducibility test of GME/cys/hemin.

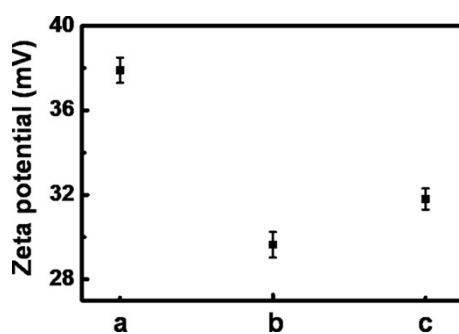

**Figure S1.** Zeta-potentials of (a) PEI/AuNPs, (b) PEI/AuNPs-hemin and (c)  $\text{Cu}^{2+}$ -PEI/AuNPs-hemin.

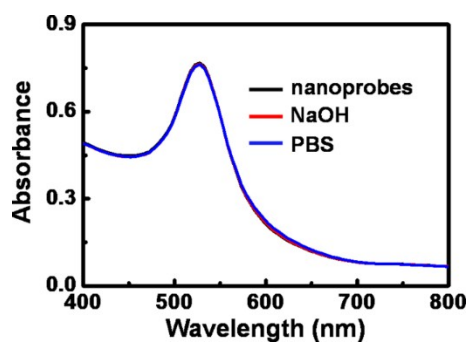

**Figure S2.** UV-vis absorption spectra of  $\text{Cu}^{2+}$ -PEI/AuNPs-hemin nanoprobe with addition of PBS (10 mM, pH = 7.4) and 10 mM NaOH.

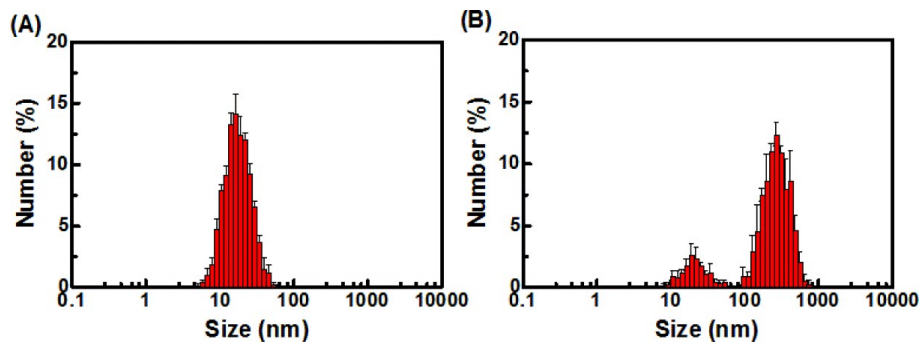

**Figure S3.** DLS analysis for  $\text{Cu}^{2+}$ -PEI/AuNPs-hemin nanoprobes (A) in the absence and (B) presence of  $1 \mu\text{M}$   $\text{A}\beta$  monomers.

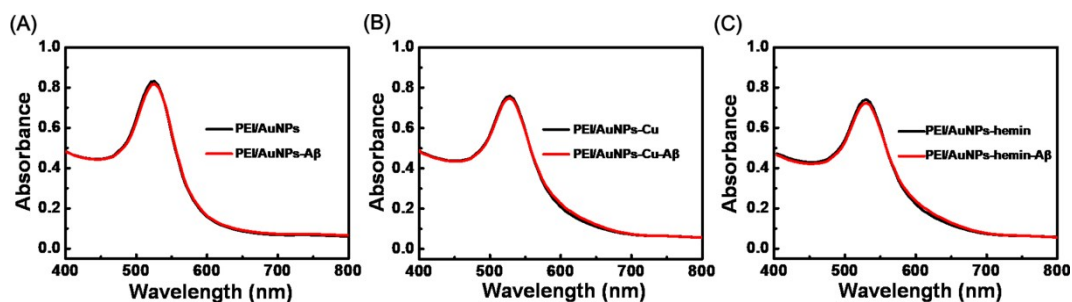

**Figure S4.** UV-vis absorption spectra of PEI/AuNPs, PEI/AuNPs- $\text{Cu}^{2+}$ , and PEI/AuNPs-hemin with addition of  $1 \mu\text{M}$   $\text{A}\beta$  monomers.

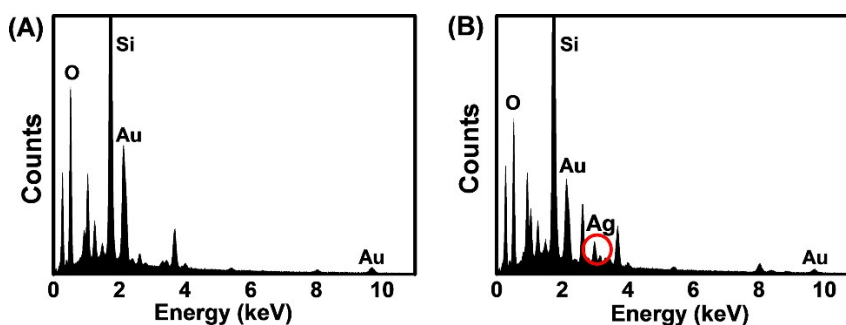

**Figure S5.** EDX spectra of GME/cys/hemin surface (a) before and (b) after silver deposition on  $\text{Cu}^{2+}$ -PEI/AuNPs-hemin-based architecture.

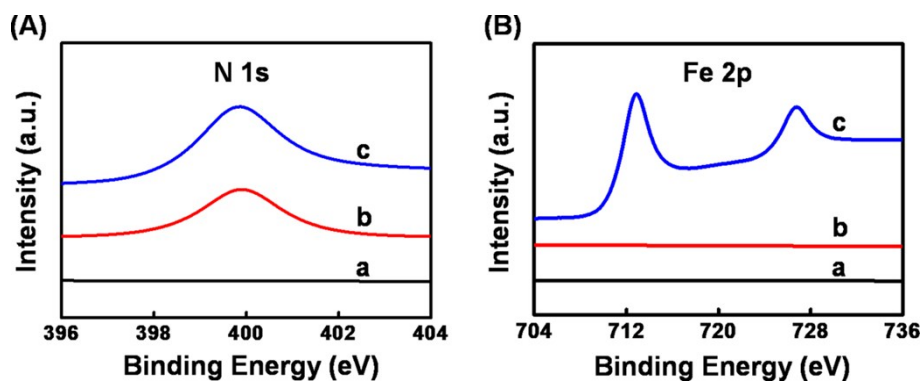

**Figure S6.** High-resolution XPS spectra of (A) N 1s, (B) Fe 2p for (a) GME, (b) GME/cys, (c) GME /cys/hemin.

As shown in Fig. S6, obvious peak of N 1s was obtained after the electrode was treated with cysteamine. Subsequently, new Fe 2p peak generated upon treatment with hemin. These results further demonstrated the successful construction of functional electrode.

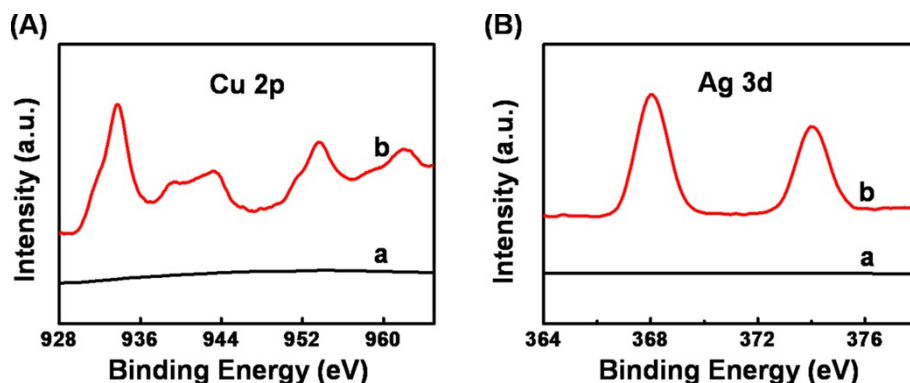

**Figure S7.** (A) High-resolution XPS spectra of Cu 2p for GME/cys/hemin (a) before and (b) after treated with 50 nM A $\beta$  monomers in the presence of Cu<sup>2+</sup>-PEI/AuNPs-hemin nanoprobe. (B) High-resolution XPS spectra of Ag 3d for GME/cys/hemin surface (a) before and (b) after silver deposition on AuNPs architecture.

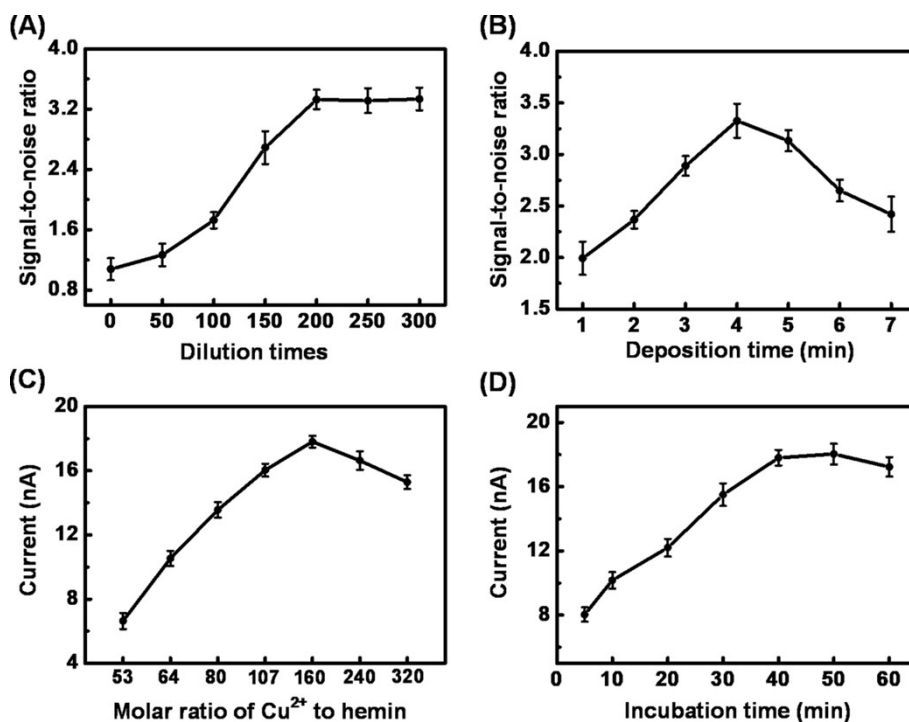

**Figure S8.** Optimization of electrochemical detection conditions. (A) Different dilution times of silver enhancer solutions, (B) silver deposition times, (C) molar ratio between Cu<sup>2+</sup> and hemin and (D) incubation time of the Cu<sup>2+</sup>-PEI/AuNPs-hemin.

The concentration of silver enhancer solutions and deposition time were explored based on background current, which was measured in the absence of Cu<sup>2+</sup>-PEI/AuNPs-hemin nanoprobe through the direct reduction of Ag<sup>+</sup> by the reducing reagent in silver enhancer solutions. We used the ratio of signal to noise to optimize the deposition conditions. Upon successive dilution of silver enhancer solutions, the signal to-noise ratio increased quickly and trended to a maximum value at 200-fold dilution (Figure S8A). Thus, the silver enhancer solutions with 200-fold dilution were used. In addition, 4 min was selected as the optimal deposition time due to the highest detection signal (Figure S8B). Considering the dual molecule recognition ability of Cu<sup>2+</sup>-PEI/AuNPs-hemin nanoprobe, the molar ratio between Cu<sup>2+</sup> and hemin to construct the nanoprobe was investigated. As shown in Figure S8C, the peak current for A $\beta$  monomers detection increased with the increasing molar ratio and reached maximum at 160:1, indicating an equilibrium between the two recognition elements coexisting in the nanoprobe to reach a high determination sensitivity. Figure S8D displayed the effect of incubation time of

Cu<sup>2+</sup>-PEI/AuNPs-hemin nanoprobe on analytical performance. With the increasing incubation time, the peak current increased and trended to a constant value after an incubation time of 40 min, which showed saturated binding between the A $\beta$  and nanoprobe. Therefore, the incubation time of 40 min was selected.

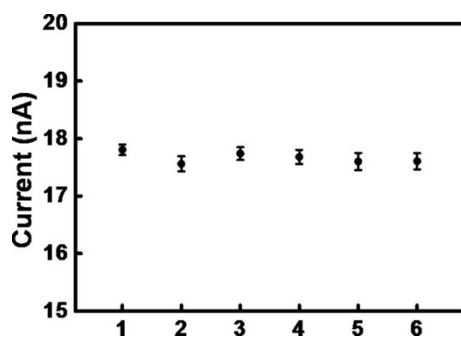

**Figure S9.** Reproducibility test of GME/cys/hemin toward 50 nM A $\beta$  monomers.
